# Supplementary material
Source: Springer Nature journal article supplement (https://www.springermedizin.de/resource/supplementary/12873_2009_90_MOESM2_ESM.pdf/9431950)

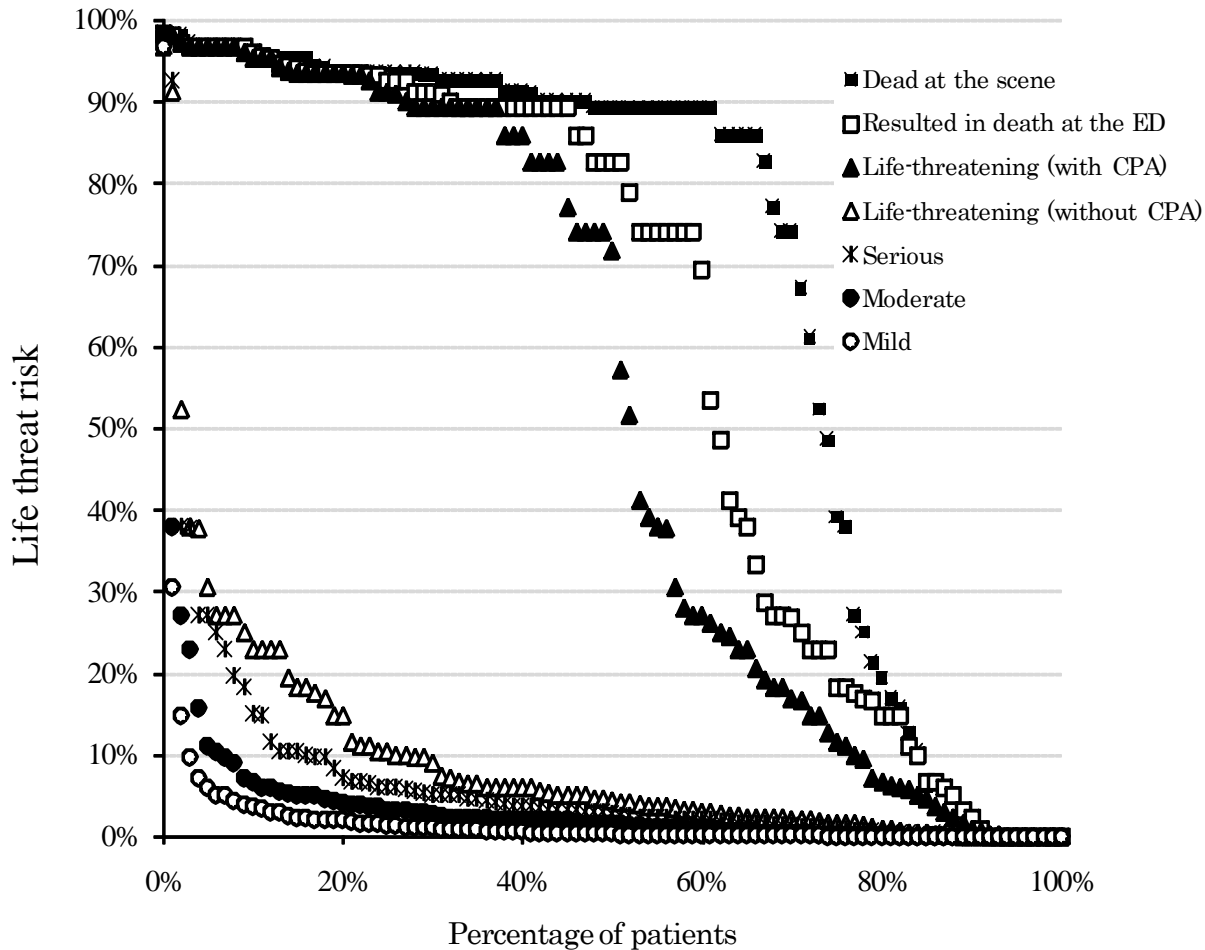

Supplement: MOESM2 [file 9431950]
